# Supplementary material for: Cytochrome P450–catalyzed hydroxylation of Δ8-tetrahydrocannabinol and implications for pharmacogenetics
Source: Research Square preprint supplement (doi:10.21203/rs.3.rs-9808179/v1), 2026-06-18
Supplement: Supplementary file 1 [file 47f2c22ca7f9a448b563df74.docx]

**Table 2.** Enzyme kinetic parameters for Δ8-THC hydroxylation by recombinant CYP2C9 variants microsomes.

| RecCYP2C9 a microsomes | or (μM) b | or (μM) b | c  (pmol∙min-1∙mg-1 protein) | or d  (µL·min-1·mg-1 protein) | Model |
| --- | --- | --- | --- | --- | --- |
| *1 | 0.31 ± 0.0074 | 0.013 ± 0.0032 | 26 ± 2.9 | 1985 ± 339 | MM e |
| *2 | 8.0 ± 2.3 | 0.35 ± 0.10 | 20 ± 2.6 | 59 ± 7.9 | SI e |
| *3 | 18 ± 1.7 | 0.76 ± 0.074 | 25 ± 1.9 | 34 ± 3.6 | MM |
| *8 | 73 ± 30 | 3.2 ± 1.3 | 292 ± 85 | 96 ± 13 | SI e |
| *9 | 4.9 ± 0.78 | 0.21 ± 0.033 | 12 ± 1.3 | 34 ± 11 d | Hill |

**a**Rec, recombinant microsomes from recombinant P450 overexpressing-HEK293 cells; MM, Michaelis Mention model; SI, substrate inhibition model.

**b** is the substrate concentration resulting in 50% of in the Hill model (analogous to the in the Michaelis-Menten model). or calculated by multiplying the unbound fraction () in the tube using for Δ9-THC (0.051 in HLM, and 0.043 in recombinant P450 microsomes) as a surrogate for Δ8-THC.8

**c** values in recombinant P450 microsomes were normalized by relative expression levels as shown in Figure 5.

**d** was calculated as in the MM and SI models; was calculated as in the Hill model. The Hill coefficient was 1.3 ± 0.11 for recombinant CYP2C9*9.

**e** For the substrate inhibition model, theestimated unboundvalues (, corrected using the for Δ9-THC as described above, were 6.7 ± 3.2 µM for recombinant CYP2C9*2 and 1.5 ± 0.68 µM for recombinant CYP2C9*8.
