# Supplementary material for: Cytochrome P450–catalyzed hydroxylation of Δ8-tetrahydrocannabinol and implications for pharmacogenetics
Source: Research Square preprint supplement (doi:10.21203/rs.3.rs-9808179/v1), 2026-06-18
Supplement: Supplementary file 2 [file 4ff9fbb4e3658936f2ceb18a.docx]

**Supplemental Tables**

**Supplemental Table 1.** Minor allele frequencies of CYP2C9 *2, *3, *8, and *9 in different populations.

| **CYP2C9 Variant** | **Genetic Impact** | **Minor Allele Frequency (MAF)** | | | |
| --- | --- | --- | --- | --- | --- |
| **European** | **African** | **Eastern Asian** | **South Asian** |
| *2 | Arg144Cys | **0.13 a** | **0.02** | < 0.01 | **0.05** |
| *3 | Ile359Leu | **0.07** | 0.01 | **0.03** | **0.11** |
| *8 | Arg150His | < 0.01 | **0.06** | < 0.01 | < 0.01 |
| *9 | His251Arg | < 0.01 | **0.08** | < 0.01 | < 0.01 |

**a**MAF > 0.02 are bolded.

**Supplemental Table 2. I**mpact of CYP2C9 *2, *3, *8, and *9 variants on Δ8-THC 11’-hydroxylation.

| Rec CYP2C9 microsomes b | Amino acid change | Fold-difference as compared to CYP2C9*1 a | | |
| --- | --- | --- | --- | --- |
| or (μM) c | (pmol∙min-1∙mg-1 protein) | or  (µL·min-1·mg-1 protein) |
| *2 | Arg144Cys | **27 (0.028)** | 1.3 (0.0527) | **34 (0.010)** |
| *3 | Ile359Leu | **58 (0.0032)** | 1.0 (0.78) | **58 (0.0099)** |
| *8 | Arg150His | 246 (0.051) | **11 (0.032)** | **21 (0.011)** |
| *9 | His251Arg | **16 (0.0091)** | **2.2 (0.0059)** | **58 (0.0099)** |

**a** Comparisons were assessed using a two-sided Students t-test, with all tests considered statistically significant at P < 0.05 (bolded). Values in parenthesis are the P-values vs CYP2C9*1.

**b**Rec, microsomes from recombinant P450 overexpressing HEK293 cells.

**c** is the substrate concentration resulting in 50% of (analogous to in the Michaelis-Menten model). or is the corrected or by multiplying the unbound fraction () of Δ9-THC in the tube (0.051 in HLM, and 0.043 in recombinant P450 microsomes).
