# Supplementary material for: Cytochrome P450–catalyzed hydroxylation of Δ8-tetrahydrocannabinol and implications for pharmacogenetics
Source: Research Square preprint supplement (doi:10.21203/rs.3.rs-9808179/v1), 2026-06-18
Supplement: Supplementary file 3 [file f96b1c8401a20d6d124bf98c.docx]

**Table 1.** Enzyme kinetic parameters for Δ8-THC hydroxylation by recombinant P450 microsomes, HLM and HIM.

| Enzyme source | or (μM) b | or (μM) b | c  (pmol∙min-1∙mg-1 total protein) | or d  (µL·min-1·mg-1 total protein) | Model |
| --- | --- | --- | --- | --- | --- |
| Rec CYP2C9 a | 0.31 ± 0.0074 | 0.013 ± 0.0032 | 26 ± 2.9 | 1985 ± 339 | MM |
| Rec CYP2C19 | 19 ± 2.4 | 0.83 ± 0.10 | 1.6 ± 0.23 | 0.97 ± 0.093 | Hill |
| HLM | 14 ± 1.3 | 0.73 ± 0.065 | 318 ± 20 | 225 ± 23 | Hill |
| HIM | 0.15 ± 0.013 | 0.0076 ± 0.00067 | 11 ± 0.91 | 1405 ± 68 | MM |

**a**Rec, recombinant microsomes from recombinant P450 overexpressing-HEK293 cells; HLM, human liver microsomes; HIM, human intestinal microsomes; MM, Michaelis Menton model.

**b** is the substrate concentration resulting in 50% of in the Hill model (analogous to in the Michaelis-Menten model). or is the corrected or calculated by multiplying the unbound fraction () in the tube using for Δ9-THC (0.051 in HLM, and 0.043 in recombinant P450 microsomes) as a surrogate for Δ8-THC.8

**c** values in recombinant P450 microsomes were normalized by relative expression levels as shown in Supplemental Figure 1 (recombinant CYP2C9 = 3.5, recombinant CYP2C19 = 1.0).

**d** was calculated as in the MM model, was calculated as in the Hill model. The Hill coefficients were 2.0 ± 0.11 for recombinant CYP2C19, and 1.6 ± 0.20 for HLM.
